# Supplementary material for: Highly sensitive “turn-on” fluorescent sensor for Hg2+ in aqueous solution based on structure-switching DNA
Source: Royal Society of Chemistry journal article supplement (doi:10.1039/b812755g), 2008-01-01
Supplement: b812755g.pdf [file b812755g.pdf]

## Highly Sensitive “Turn-on” Fluorescent Sensor for Hg<sup>2+</sup> in Aqueous Solution based on Structure-Switching DNA

Zidong Wang,<sup>a,b</sup> Jung Heon Lee,<sup>a,b</sup> and Yi Lu<sup>a,b,c\*</sup>

<sup>a</sup>Department of Materials Science and Engineering, University of Illinois at Urbana-Champaign, 1304 W. Green Str., Urbana, IL-61801, USA.

<sup>b</sup>Beckman Institute for Advanced Science and Technology, University of Illinois at Urbana-Champaign, 405 N. Mathews Ave., Urbana, IL-61801, USA.

<sup>c</sup>Department of Chemistry, University of Illinois at Urbana-Champaign, 608 S. Mathews Ave., Urbana, IL-61801, USA. Fax: (+1) 217-333-2685; Tel: (+1) 217-333-2619; E-mail: [yi-lu@uiuc.edu](mailto:yi-lu@uiuc.edu)

### Electronic Supplementary Information (Experimental section, Figure S1, Dissociation constant calculation)

#### Experimental section

##### Sensor Preparation and Mercury Detection:

All oligonucleotides were purchased from Integrated DNA Technologies (Coralville, IA) and were purified by HPLC. To prepare the sensor solution, 100 nM Strand A (5'-FAM-TCATGTTTGTGGCCCCCTTCTTTCTTA-3') and 400 nM Strand B (5'-ACAAACATGA-BHQ1-3') were added to 100 mM NaNO<sub>3</sub> and 10 mM MOPS (3-(N-morpholino)propanesulfonic acid), pH 7.2 buffer solution and kept at room temperature for 1 h to hybridize two strands. Then 500 μL of the sensor solution prepared above was transferred to a cuvette. The cuvette was placed in a fluorimeter (FluoroMax-P; Horiba Jobin Yvon, Edison, NJ) at 25 °C. The excitation was set at 491 nm and the emission at 518 nm was monitored. After the initial reading, the cuvette was taken out, and a small volume of concentrated Hg<sup>2+</sup> solution was added. After vortexing, the cuvette was put back into the fluorimeter to continue the kinetics measurement.

##### Quantum yield of the fluorescent sensor:

The fluorescence intensity of the free FAM and FAM attached to DNA strand A at the same concentration (100 nM) and under the same pH (7.2) was measured and compared. As shown in Figure S1, about 88% of the FAM fluorescence intensity was retained after DNA conjugation to FAM. Since the free FAM in aqueous solution at pH 7.2 has the fluorescence quantum yield of 75% (see

<http://www.promega.com/geneticidproc/ussymp8proc/21.html>), we estimated the fluorescence quantum yield of FAM after DNA conjugation to be ~ 66%.

### Selectivity Assay:

To determine the selectivity of the sensor, 1  $\mu\text{M}$  of various metal ions ( $\text{M}^{2+}$ ) including  $\text{Mg}^{2+}$ ,  $\text{Ca}^{2+}$ ,  $\text{Mn}^{2+}$ ,  $\text{Co}^{2+}$ ,  $\text{Ni}^{2+}$ ,  $\text{Cu}^{2+}$ ,  $\text{Pb}^{2+}$ ,  $\text{Zn}^{2+}$ ,  $\text{Cd}^{2+}$ , and  $\text{Hg}^{2+}$  was added to the sensor solution individually and the fluorescence increase was monitored using a fluorimeter. In addition, 1  $\mu\text{M}$   $\text{Hg}^{2+}$  and 1  $\mu\text{M}$  one of other metal ions ( $\text{Hg}^{2+}$ - $\text{M}^{2+}$  pair) were added together to the sensor solution and the fluorescence response was recorded as well.

### Mercury Detection in Pond Water:

A pond water sample was collected from the University of Illinois campus and filtered through 0.22  $\mu\text{m}$  membrane before testment. 180  $\mu\text{L}$  of the pond water was mixed with concentrated buffer and  $\text{Hg}^{2+}$  solution to make the final volume of 200  $\mu\text{L}$  containing 500 nM  $\text{Hg}^{2+}$ , 100 mM  $\text{NaNO}_3$  and 10 mM MOPS at pH 7.2. 300  $\mu\text{L}$  concentrated sensor solution was then mixed with 200  $\mu\text{L}$  of previously prepared pond water and the fluorescence response was monitored by fluorimeter. The final mixture contained 200 nM  $\text{Hg}^{2+}$  and 100 nM hybridized DNA.

**Figure S1**

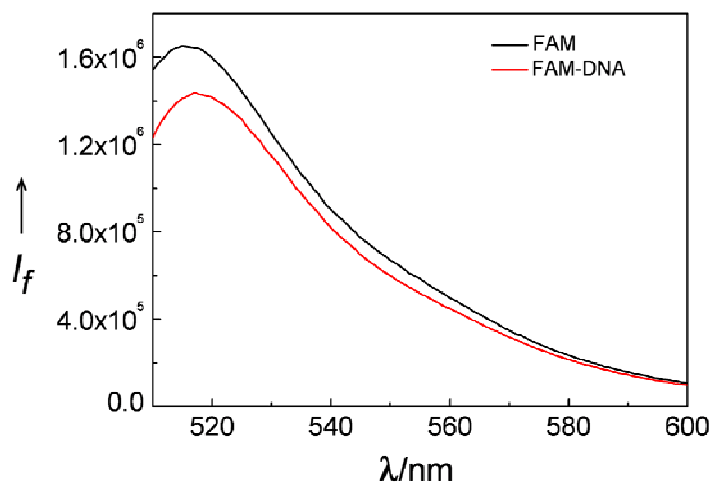

**Figure S1:** Fluorescence spectra of free FAM (black line) and FAM attached to DNA strand A (red line) at same concentration and buffer conditions (100 nM, pH 7.2 MOPS buffer)

## DISSOCIATION CONSTANT CALCULATION

Through fitting calibration curve in Figure 2b using following equation in Origin Software, the dissociation constant ( $k$ ) was calculated to be 471 nM with a Hill coefficient ( $n$ ) of 2.4.

$$y = y_0 + (y_m - y_0) * \frac{x^n}{k^n + x^n}$$

$k$  : Dissociation constant

$n$  : Hill coefficient

$x$  :  $\text{Hg}^{2+}$  concentration

$y_0$  : Background fluorescence intensity

$y_m$  : Saturated fluorescence intensity
